# Supplementary material for: Satellite monitoring of war urban damage with a temporal knowledge-guided deep learning scheme
Source: Research Square preprint supplement (doi:10.21203/rs.3.rs-2799404/v1), 2023-05-04
Supplement: Supplementary file 1 [file 80ba2f3652081d8d2aaa4516.pdf]

# Satellite monitoring of war urban damage with a temporal knowledge-guided deep learning scheme

Zhengyang Hou<sup>1†</sup>, Ying Qu<sup>1†</sup>, Liqiang Zhang<sup>1\*</sup>, Qian Shi<sup>2</sup>, Qiwei Yu<sup>1\*</sup>, Yuanyuan Zhao<sup>3</sup>, Hong Tang<sup>1</sup>, Yuebin Wang<sup>1</sup>, Xingang Li<sup>1</sup>, Yang Li<sup>1</sup>, Shuwen Peng<sup>1</sup>, Xin Yao<sup>1</sup> and Chenghu Zhou<sup>4</sup>

<sup>1</sup>State Key Laboratory of Remote Sensing Science, Faculty of Geographical Science, Beijing Normal University, Beijing, 100875, China.

<sup>2</sup>Guangdong Provincial Key Laboratory for Urbanization and Geo-simulation, School of Geography and Planning, Sun Yat-sen University, Guangzhou, 510006, China.

<sup>3</sup>College of Land Science and Technology, China Agricultural University, Beijing, 100193, China.

<sup>4</sup>State Key Laboratory of Resources and Environment Information System, Institute of Geographical Science and Natural Resources, Chinese Academy of Sciences, Beijing, 100101, China.

\*Corresponding author(s). E-mail(s): [zhanglq@bnu.edu.cn](mailto:zhanglq@bnu.edu.cn);

†These authors contributed equally to this work.

**18 The File Includes:**

**19 1 Technical Terms**

**20 2 Supplementary Note 1**

**21 3 Supplementary Figures**

**22 4 Supplementary Tables**

## 1 Technical Terms

**Precision:** Precision measures the accuracy of the positive predictions, which is the proportion of the true positive predictions among all the positive predictions made by the model. Precision is given by  $TP/(TP + FP)$ , where  $TP$  is the number of the true positive predictions and  $FP$  is the number of the false positive predictions.

**Recall:** Recall measures the completeness of the positive predictions, which is the proportion of the true positive predictions among all actual positive samples in the dataset. Recall is given by  $TP/(TP + FN)$ , where  $FN$  is the number of the false negative predictions.

**F1 score:** A evaluation metric for classification tasks that takes into account both precision and recall. It is the harmonic mean of precision and recall, and ranges from 0 to 1, with 1 indicating perfect precision and recall. A high F1 score indicates that a classifier has both high precision and high recall. It is expressed by  $2 \times (precision \times recall)/(precision + recall)$ .

**False positive rate (FPR):** The ratio of the number of the false positives to the total number of negatives in a binary classification problem. It measures the proportion of the negative instances that are incorrectly classified as positive, and is expressed by  $FP/(TN + FP)$ , where  $TN$  is the number of the true negative predictions.

**True positive rate (TPR):** The ratio of the number of the true positives to the total number of the positives in a binary classification problem. It measures the proportion of the positive instances that are correctly classified as positive, and is expressed by  $TP/(TP + FN)$ .

**Receiver operating characteristic curve (ROC curve):** The ROC curve plots the TPR against the FPR for different threshold values. A higher ROC curve implies better classification performance, as it indicates a higher TPR for a given FPR.

**Area Under the Curve (AUC):** AUC measures the area under the ROC curve, and is a single scalar value that represents the overall performance of a classifier across all possible classification thresholds. AUC ranges from 0 to 1, with a value of 0.5 indicating a random classifier and a value of 1 indicating a perfect classifier.

**Precision-recall curve (PR curve):** The PR curve evaluates the PR trade-off of a model. The PR curve plots precision on the y-axis and recall on the x-axis, with each point on the curve representing a different threshold for the model classification decision. A higher PR curve implies better classification performance, as it indicates a higher precision for a given recall. Because both

68 precision and recall are calculated based on positive instances. Compared to the  
69 ROC curve, the PR curve can capture the classifier’s performance on positive  
70 instances better, and is more suitable in situations when the positive class is  
71 rare and the goal is to maximize precision.

72

73 **Average precision (AP):** AP is a measure of the average value of  
74 the precision-recall curve over all possible recall values. It summarizes the  
75 precision-recall curve as the weighted mean of precision achieved at each  
76 threshold, with the recall as the weight. AP ranges from 0 to 1, with a value of  
77 0 indicating a random classifier and a value of 1 indicating a perfect classifier.

78

79 **Gradient-weighted class activation mapping (Grad-CAM):** Grad-  
80 CAM is a visual interpretation technique used to visualize important feature  
81 regions in a network model to aid in understanding the mechanism behind  
82 model decisions. It determines which regions in the feature map contribute  
83 more to the model classification decision by calculating the gradient weights  
84 of the model output with respect to the input feature map. Specifically, the  
85 Grad-CAM can compute the importance of each feature map channel to the  
86 predicted class label by backpropagating the predicted output label and cal-  
87 culating the gradients. The importance of these channels is then summed with  
88 weights to produce a heat map, where the colors represent the contribution of  
89 each region to the classification result.

90

91 **10-fold cross validation:** It involves dividing the available data into 10 equal  
92 parts, or “folds”, and using 9 of them for training and the remaining ones for  
93 testing. This process is repeated 10 times, with each fold used as the test set,  
94 while the other 9 folds are used for training. The final performance metric is  
95 the average of the 10 metrics. Cross-validation can evaluate the model’s ability  
96 to adapt to different data distributions by randomly shuffling the data in each  
97 fold, which helps assess the model performance on unknown data.

## 98 2 Supplementary Note 1

99 **Performance of the TKDS-PtNet-SCL** On the 10m-resolution Syrian  
100 dataset, the improvement in accuracy of the TKDS-PtNet-SCL come from two  
101 aspects: utilization of temporal pattern knowledge in the TKDS and extraction  
102 of inter-class difference features learned by SCL. First, the TKDS improved  
103 the F1 score of PtNet by 27.4 (66.0 vs 38.6). Then, we integrated PtNet with  
104 SCL, and obtained the weights of the upstream task after 1000 epochs of  
105 training as the initial weights of PtNet in the TKDS-PtNet model. The TKDS-  
106 PtNet model with SCL weights (i.e. TKDS-PtNet-SCL) achieved the highest  
107 F1 score (72.4), higher than that of the TKDS-PtNet model (66.0). Moreover,  
108 the F1 score of PtNet increased to 40.26 from 38.6 after the SCL weights were  
109 added, which was the same detection accuracy level as ResNet-50 on 0.5m-  
110 resolution remote sensing images (F1=40.5). Since our method fully utilized  
111 the temporal and spectral information of pre- and post-damage features, it  
112 achieved higher detection accuracy for building damage from both high- and  
113 medium-resolution remote sensing images, even with extremely imbalanced  
114 samples.

115 **3 Supplementary Figures**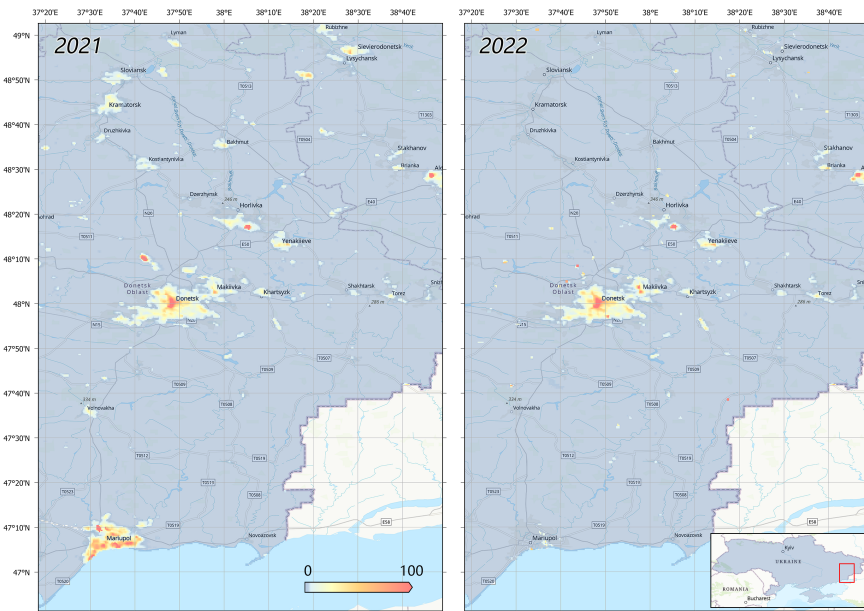

116

117 **Supplementary Fig. 1 | Average radiance composite images using nighttime**  
 118 **data from the Visible Infrared Imaging Radiometer Suite (VIIRS) Day/Night**  
 119 **Band in 2021 (left) and March to June 2022 (right) in southeastern Ukraine. The**  
 120 **average radiance of the four Ukrainian cities (i.e. Sievierodonetsk, Rubizhne, Volnovakha**  
 121 **and Mariupol cities) in March to June 2022 was only 8.1% in 2021, and Mariupol city was**  
 122 **only 6.5% in 2021 (those in Sievierodonetsk, Rubizhne and Volnovakha areas were 18.85%,**  
 123 **32.67% and 10.62%, respectively).**

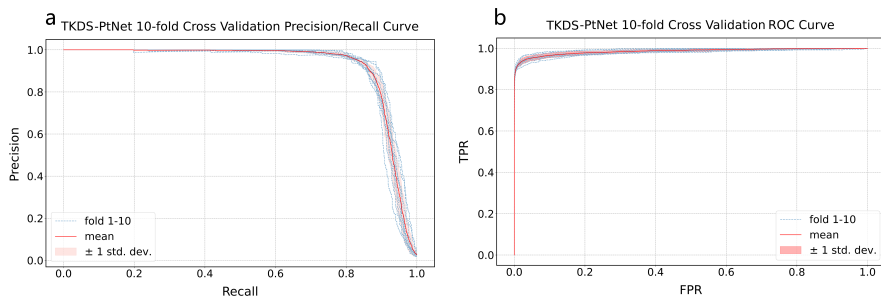

124

125 **Supplementary Fig. 2 | The performance of the TKDS-PtNet on the Ukrainian**  
126 **urban damage with 10-fold cross validations.** The blue dashed lines represent the PR  
127 curves in **a**, and the AUC/ROC curves in **b** for the folds 1-10. The red solid lines represent the  
128 mean for the folds 1-10. The pink region represents the positive and negative one standard  
129 deviation.

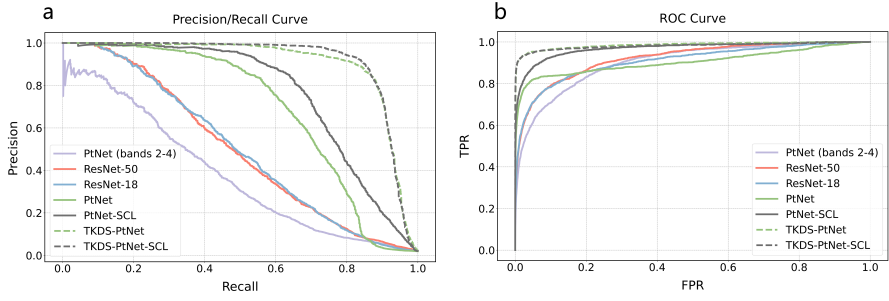

130

131 **Supplementary Fig. 3 | Precision performance of the models using Sentinel-2**  
 132 **images in Ukrainian cities. a.** The precision-recall curve. **b.** The ROC curve.

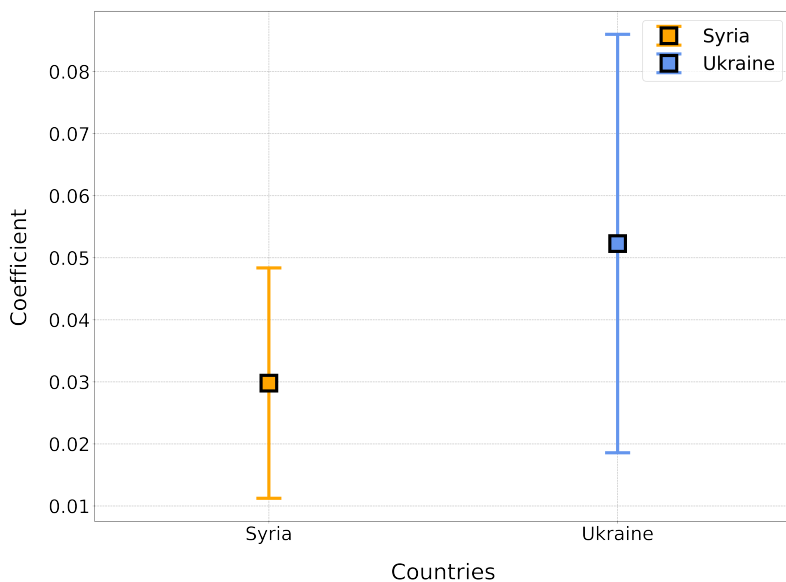

133

134 **Supplementary Fig. 4 | The associations of the predicted results of building**  
135 **damage with bombing events from LiveUMap in Syria and Ukraine.** Error bars  
136 represent 95% confidence intervals. The robust standard error is clustered at the location of  
137 patch level.

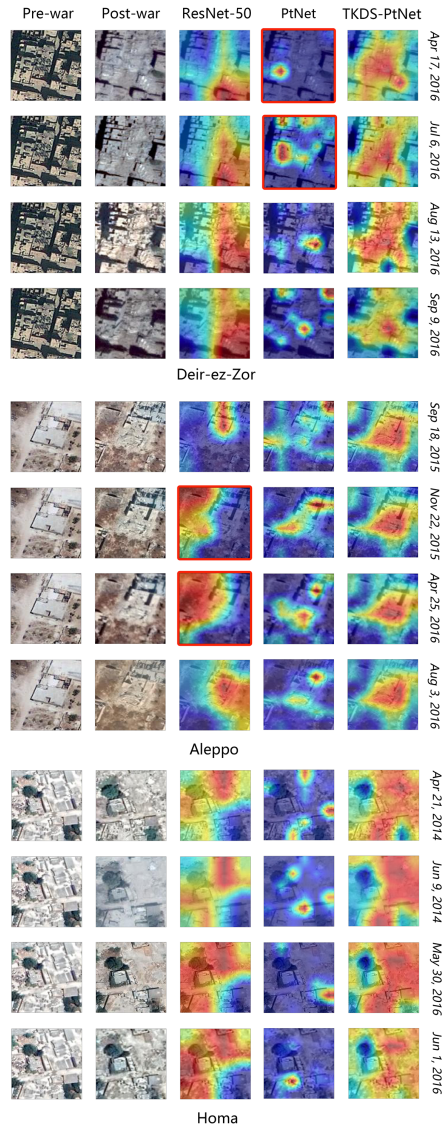

138

139 **Supplementary Fig. 5 | Model interpretability based on the Grad-CAM,**  
 140 **showing four groups of 0.5m-resolution multi-temporal images from different**  
 141 **damaged areas in Syrian cities. The sub-figures in the first and second columns from the**  
 142 **left to the right show the pre-war images from the same date and post-war damage images**  
 143 **from four different dates. Those in the third, fourth, and fifth columns show the activation**  
 144 **maps of ResNet-50, PtNet, and TKDS-PtNet, respectively, with red borders representing**  
 145 **the incorrect class output.**

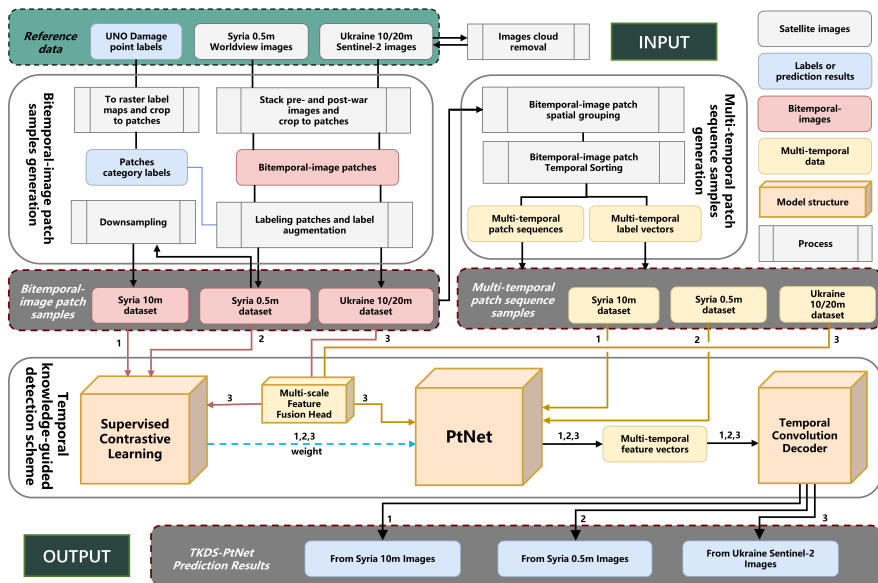

146

147 Supplementary Fig. 6 | The urban destruction monitoring workflow.

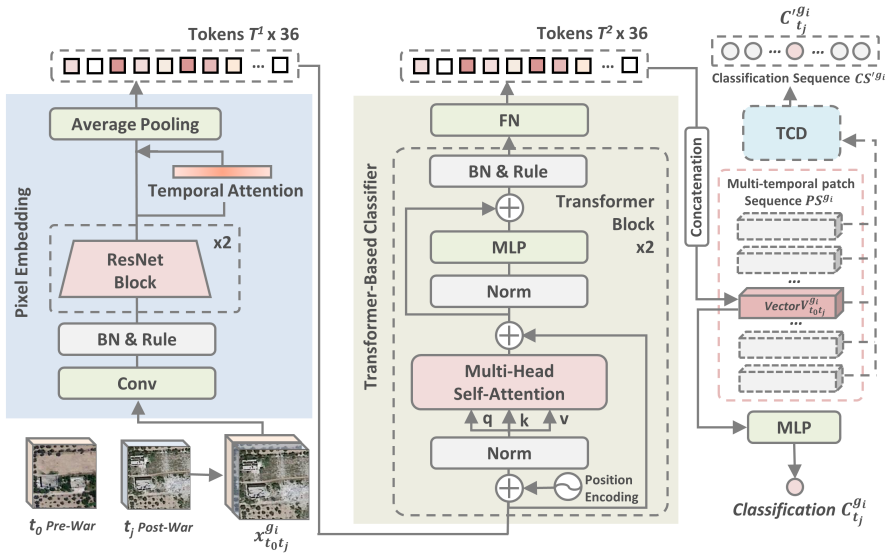

148

149 **Supplementary Fig. 7 | The TKDS-PtNet architecture.**

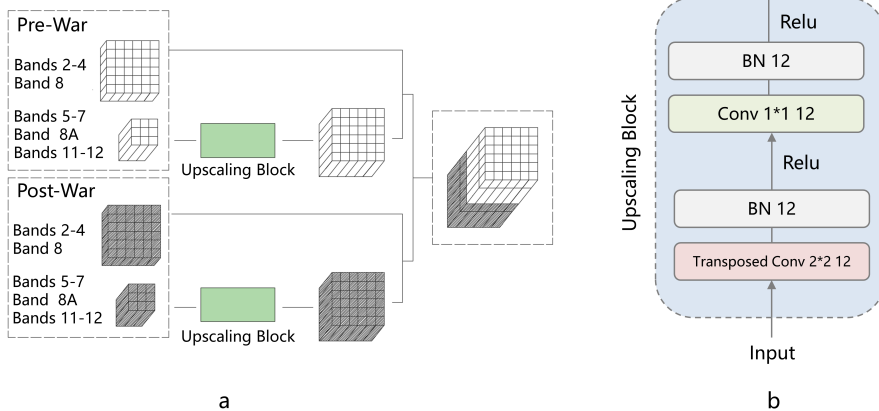

150

a

151

**Supplementary Fig. 8 | The architecture of the multi-scale feature fusion head.**

b

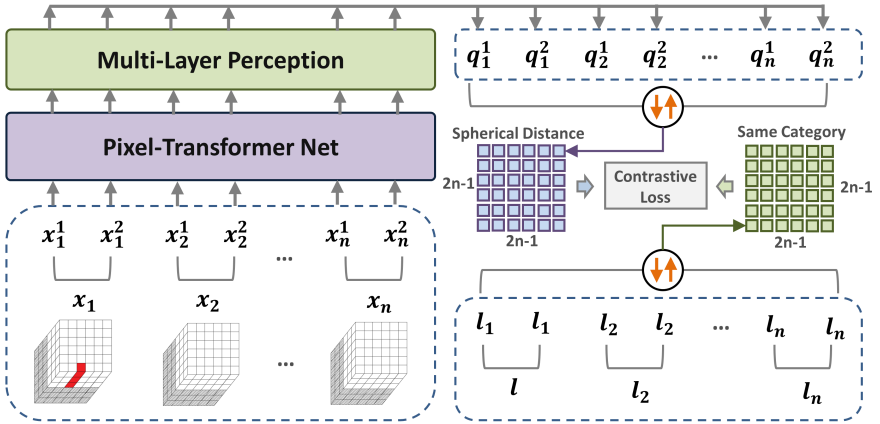

152

153 **Supplementary Fig. 9 | The supervised contrastive learning architecture.**

**Patch Sequence in grid  $g_i$** 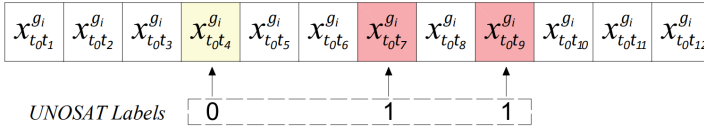**Patch Sequence After Label Augmentation**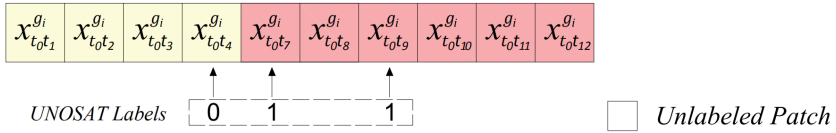**Patch Sequence After RCD**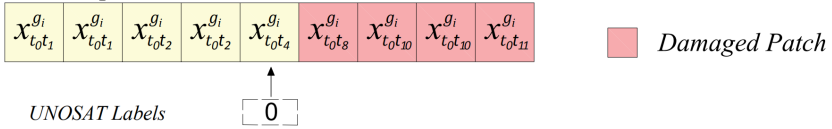

154

155 **Supplementary Fig. 10 | Random Copy and Delete (RCD) used to eliminate**  
 156 **pseudo temporal regularity.  $t_j$  is the capture time of the images.**

## 157 4 Supplementary Tables

158 **Supplementary Table 1 | Performance and generalization of the models in**  
 159 **Ukrainian cities**

| Country   | Region         | Train/<br>validation<br>patches | Destroyed<br>patches, % | Train/<br>validation<br>MPS* | MPS* with<br>destroyed<br>patches, % |
|-----------|----------------|---------------------------------|-------------------------|------------------------------|--------------------------------------|
| 160 Syria | Aleppo         | 469,558/201,24                  | 2.84%                   | 29,365/12,586                | 6.21%                                |
|           | Hama           | 98,896/42,456                   | 5.90%                   | 8,325/3,569                  | 9.98%                                |
|           | Homs           | 47,328/20,282                   | 9.05%                   | 6,756/2,896                  | 10.16%                               |
|           | Raqqa          | 46,369/19,889                   | 4.73%                   | 5,115/2,193                  | 7.38%                                |
|           | Deir-Ez-Zor    | 50,570/21,706                   | 4.78%                   | 4,571/1,961                  | 6.34%                                |
|           | Idlib          | 21,518/9,217                    | 2.18%                   | 1,790/768                    | 4.14%                                |
|           | All            | 734,239/314,794                 | 3.88%                   | 55,922/23,973                | 7.30%                                |
| Ukrain    | Mariupol       | 53,530/22,878                   | 2.41%                   | 12,877/5,524                 | 1.66%                                |
|           | Rubizhne       | 57,269/24,573                   | 2.50%                   | 5,429/2,328                  | 4.19%                                |
|           | Siwvierodoetsk | 66,426/28,463                   | 0.39%                   | 6,438/2,761                  | 0.85%                                |
|           | Volnovskha     | 23,960/10,277                   | 3.29%                   | 3,928/1,685                  | 3.60%                                |
|           | All            | 201,185/86,191                  | 1.87%                   | 28,672/12,298                | 2.22%                                |

161 MPS\*: multi-temporal patch sequence

162 **Supplementary Table 2 | Performance and generalization of the models in**  
 163 **Ukrainian cities**

| Resolution | City        | ResNet-50 |       | PtNet |       | TKDS-PtNet |       |
|------------|-------------|-----------|-------|-------|-------|------------|-------|
|            |             | F1        | AUC   | F1    | AUC   | F1         | AUC   |
| 10m        | Aleppo      | 24.14     | 82.85 | 33.32 | 86.77 | 57.61      | 95.59 |
|            | Hama        | 35.40     | 75.63 | 48.46 | 83.96 | 70.84      | 95.21 |
|            | Homs        | 35.32     | 77.47 | 46.35 | 84.85 | 92.71      | 98.83 |
|            | Raqqa       | 36.01     | 78.91 | 46.87 | 82.86 | 86.16      | 98.23 |
|            | Deir-Ez-Zor | 3.09      | 73.25 | 31.13 | 79.66 | 54.35      | 91.67 |
|            | Idlib       | 5.69      | 65.35 | 22.22 | 72.08 | 34.80      | 80.17 |
|            | All         | 28.52     | 80.74 | 38.56 | 85.57 | 65.99      | 95.86 |
| 0.5m       | Aleppo      | 39.29     | 87.28 | 52.89 | 88.83 | 82.97      | 98.66 |
|            | Hama        | 47.98     | 79.88 | 63.67 | 85.45 | 87.60      | 83.20 |
|            | Homs        | 46.07     | 84.38 | 58.26 | 88.58 | 98.26      | 99.94 |
|            | Raqqa       | 40.85     | 82.76 | 59.06 | 88.59 | 95.41      | 99.41 |
|            | Deir-Ez-Zor | 19.37     | 70.92 | 38.13 | 79.79 | 72.06      | 95.14 |
|            | Idlib       | 16.90     | 72.36 | 22.77 | 73.81 | 70.23      | 96.12 |
|            | All         | 40.50     | 84.22 | 54.68 | 88.15 | 86.05      | 98.51 |

165 **Supplementary Table 3 | The associations of the predicted building damage**  
 166 **results with bombing events from LiveUAmap in Syrian and Ukrainian cities**

|                                | (1)<br>Syria<br>Predicted value | (2)<br>Ukraine<br>Predicted value |
|--------------------------------|---------------------------------|-----------------------------------|
| 167 After bombing event or not | 0.029799***<br>(0.009479)       | 0.052290***<br>(0.017204)         |
| Grid Fixed Effects             | Yes                             | Yes                               |
| City-Time Fixed Effects        | Yes                             | Yes                               |
| Obs.                           | 1,310,123                       | 2,012,674                         |
| Mean                           | 0.026675                        | 0.011871                          |

168 **Notes.** The first row lists the coefficients from the two-way fixed effects model, and robust  
 169 standard errors in parentheses. \* $P < 0.1$ , \*\*  $P < 0.05$ , \*\*\*  $P < 0.01$ . Dependent variables in  
 170 Columns (1) and (2) are the prediction scores of building damage in the six Syrian cities  
 171 and four in Ukrainian cities using the TKDS-PtNet
